# Supplementary material for: Effect of D168V mutation in NS3/4A HCV protease on susceptibilities of faldaprevir and danoprevir
Source: Royal Society of Chemistry journal article supplement (doi:10.1039/c6mb00610h), 2016-10-12
Supplement: c6mb00610h1.pdf [file c6mb00610h1.pdf]

## Supporting information

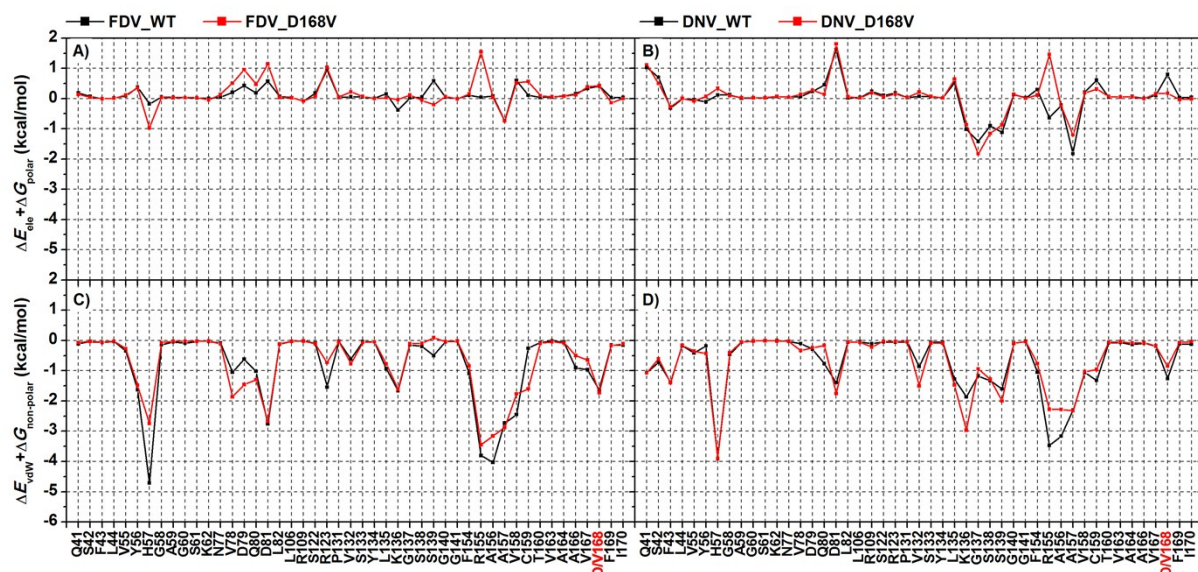

**Fig. S1** Energetic components contributed from electrostatic ( $\Delta E_{ele} + \Delta G_{polar}$ ) and van der Waals ( $\Delta E_{vdW} + \Delta G_{non-polar}$ ) terms of NS3 protease domain for wild-type and D168V complexes as shown in black and red lines,
